# Supplementary material
Source: PubMed Central journal article supplement (PMC4468498)
Supplement: JVI.00528-15_zjv999090512so1.pdf [file JVI.00528-15_zjv999090512so1.pdf]

**TABLE S1.** Normalized mRNA and ribosome footprint reads mapped to VACV ORFs

| VACV-WR ORF* | VACV-COP    | Temporal expression** | mRNA-2h | mRNA-4h | mRNA-8h | Ribo-2h  | Ribo-4h  | Ribo-8h  | Early gene ribosome footprint cluster |
|--------------|-------------|-----------------------|---------|---------|---------|----------|----------|----------|---------------------------------------|
| 001/218      | C23L        | E                     | 1088415 | 720538  | 962550  | 1499688  | 1620119  | 4054847  | C1                                    |
| 002/217      | pseudogene  | E                     | 62967   | 120568  | 181723  | 1055     | 13621    | 107653   | C1                                    |
| 003/216      | no ortholog | NA                    | 416     | 41906   | 44946   | 479      | 33796    | 41649    |                                       |
| 004/215      | C22L        | E                     | 60865   | 139841  | 174055  | 36246    | 596518   | 869412   | C1                                    |
| 005/214      | pseudogene  | E                     | 173509  | 332536  | 398289  | 4781     | 43378    | 102077   | C1                                    |
| 006/213      | C21L        | E                     | 48122   | 147669  | 190478  | 8073     | 47644    | 145115   | C1                                    |
| 007/212      | no ortholog | E                     | 174783  | 545097  | 515021  | 2918     | 44038    | 187798   | C1                                    |
| 008/211      | C19L        | L                     | 116168  | 365233  | 437925  | 341032   | 292363   | 578896   |                                       |
| 009/210      | C11R        | E                     | 7925095 | 805292  | 446516  | 21247140 | 3023859  | 1501923  | C3                                    |
| 010/209      | C10L        | E                     | 1035261 | 924698  | 1239615 | 2264782  | 1155110  | 1104305  | C2                                    |
| 011/208      | no ortholog | E                     | 814113  | 226732  | 337679  | 1388347  | 946739   | 626514   | C2                                    |
| 012/207      | no ortholog | E                     | 1311934 | 327723  | 437938  | 118162   | 259822   | 255846   | C1                                    |
| 13           | no ortholog | E                     | 295126  | 285114  | 555828  | 4298076  | 2646385  | 3307545  | C2                                    |
| 14           | no ortholog | E                     | 111569  | 262795  | 652068  | 10143    | 56514    | 99788    | C1                                    |
| 15           | no ortholog | E                     | 141924  | 378525  | 807666  | 2899     | 67232    | 146564   | C1                                    |
| 16           | no ortholog | E                     | 156989  | 340730  | 867978  | 10160    | 32383    | 167197   | C1                                    |
| 17           | no ortholog | E                     | 207180  | 594487  | 1118917 | 8894     | 198769   | 369087   | C1                                    |
| 18           | no ortholog | E                     | 7831211 | 1649112 | 1735932 | 18505965 | 6728305  | 3020736  | C3                                    |
| 19           | C9L         | E                     | 223467  | 836723  | 1545409 | 350879   | 168308   | 273362   | C2                                    |
| 20           | C8L         | L                     | 48026   | 1081928 | 1790573 | 5905     | 2295677  | 1906086  |                                       |
| 21           | C7L         | E                     | 214455  | 452277  | 1189626 | 1056175  | 319064   | 1106210  | C2                                    |
| 22           | C6L         | E                     | 2672851 | 1472592 | 2747534 | 3660075  | 553020   | 646540   | C3                                    |
| 23           | C5L         | E                     | 976141  | 1715165 | 2762578 | 1623878  | 292161   | 285635   | C3                                    |
| 24           | C4L         | E                     | 511539  | 1739486 | 2277420 | 623841   | 153327   | 305834   | C3                                    |
| 25           | C3L         | L                     | 51989   | 1305585 | 1644208 | 58763    | 9272754  | 6321141  |                                       |
| 26           | C2L         | E                     | 300237  | 1102293 | 2093416 | 223110   | 134509   | 350014   | C1                                    |
| 27           | C1L         | E                     | 2628291 | 3294361 | 4077484 | 870568   | 328522   | 1476306  | C1                                    |
| 28           | N1L         | E                     | 1203645 | 1382603 | 2900326 | 3330939  | 11342780 | 14260755 | C1                                    |
| 29           | N2L         | E                     | 1828108 | 421724  | 628380  | 6987681  | 971226   | 656820   | C3                                    |
| 30           | M1L         | E                     | 1060790 | 738040  | 1099384 | 1284961  | 466284   | 527747   | C3                                    |
| 31           | M2L         | E                     | 1003665 | 643906  | 1059083 | 3462301  | 564228   | 537103   | C3                                    |
| 32           | K1L         | E                     | 847260  | 1157696 | 1532292 | 1589665  | 1605238  | 3645468  | C1                                    |
| 33           | K2L         | I                     | 315123  | 1624274 | 2164703 | 344690   | 841700   | 2271025  |                                       |
| 34           | K3L         | E                     | 868503  | 2726610 | 3455365 | 1125464  | 1590511  | 4704339  | C1                                    |
| 35           | K4L         | I                     | 195488  | 344428  | 533590  | 48889    | 971326   | 934276   |                                       |
| 36           | pseudogene  | E                     | 1619593 | 880014  | 950327  | 20585    | 121161   | 102866   | C1                                    |
| 37           | K5L         | E                     | 514385  | 329985  | 343320  | 161877   | 56058    | 140243   | C2                                    |
| 38           | K6L         | E                     | 453244  | 351463  | 357825  | 1642639  | 506078   | 660807   | C3                                    |
| 39           | K7R         | E                     | 255649  | 114314  | 147697  | 869998   | 419863   | 330113   | C3                                    |
| 40           | F1L         | E                     | 1970582 | 707620  | 730345  | 736070   | 878106   | 589443   | C2                                    |
| 41           | F2L         | E                     | 2905271 | 1023092 | 945082  | 5731347  | 1897851  | 1415189  | C3                                    |
| 42           | F3L         | E                     | 381851  | 685833  | 667249  | 406509   | 355988   | 410512   | C2                                    |
| 43           | F4L         | E                     | 1822909 | 1282170 | 873496  | 3508287  | 761430   | 506088   | C3                                    |
| 44           | F5L         | E                     | 271109  | 1328442 | 786591  | 660230   | 889699   | 1210003  | C2                                    |

|      |        |   |         |          |          |          |          |          |    |
|------|--------|---|---------|----------|----------|----------|----------|----------|----|
| 45   | F6L    | E | 179030  | 1193574  | 842777   | 1433144  | 5259340  | 4644457  | C1 |
| 46   | F7L    | E | 1949730 | 1777476  | 1382912  | 2283708  | 876540   | 837912   | C3 |
| 47   | F8L    | E | 176869  | 764373   | 673488   | 887805   | 5296728  | 3556954  | C1 |
| 48   | F9L    | L | 20547   | 518628   | 495067   | 17532    | 944420   | 689254   |    |
| 49   | F10L   | L | 228858  | 442336   | 445673   | 11049    | 373367   | 329040   |    |
| 50   | F11L   | E | 2905520 | 784523   | 657502   | 5068901  | 619564   | 415268   | C3 |
| 51   | F12L   | E | 789401  | 1404506  | 751460   | 1200084  | 212010   | 284582   | C3 |
| 52   | F13L   | I | 66625   | 2333863  | 1521259  | 2027     | 6416022  | 3277378  |    |
| 53   | F14L   | E | 938295  | 1526331  | 1656666  | 3450412  | 3387378  | 5525949  | C2 |
| 53.5 | F14.5L | E | 212499  | 572257   | 732110   | 143134   | 3028714  | 1906148  | C1 |
| 54   | F15L   | E | 993934  | 811808   | 877091   | 1204369  | 642357   | 1072049  | C2 |
| 55   | F16L   | E | 739902  | 398651   | 657480   | 1035372  | 1024836  | 951457   | C2 |
| 56   | F17R   | L | 5766    | 2875520  | 3207122  | 2729     | 18595167 | 17013444 |    |
| 57   | E1L    | E | 270575  | 133683   | 494532   | 222351   | 330933   | 243939   | C2 |
| 58   | E2L    | E | 195904  | 267760   | 386383   | 171992   | 160286   | 173487   | C2 |
| 59   | E3L    | E | 6333824 | 931771   | 725784   | 16992412 | 4088917  | 3478792  | C3 |
| 60   | E4L    | E | 862593  | 236573   | 351916   | 2497688  | 676893   | 669382   | C3 |
| 61   | E5R    | E | 765544  | 319679   | 431743   | 1176068  | 598699   | 704925   | C2 |
| 62   | E6R    | I | 146942  | 496720   | 468897   | 173918   | 599280   | 371879   |    |
| 63   | E7R    | I | 61879   | 736870   | 653894   | 61235    | 2691352  | 1055328  |    |
| 64   | E8R    | I | 81947   | 937000   | 736691   | 15316    | 821516   | 641118   |    |
| 65   | E9R    | E | 588962  | 658052   | 1968576  | 814386   | 524293   | 622736   | C2 |
| 66   | E10R   | L | 14185   | 237268   | 234487   | 6021     | 1317662  | 912563   |    |
| 67   | E11R   | I | 211021  | 1972461  | 4821352  | 37653    | 2244916  | 2774262  |    |
| 68   | O1L    | E | 1794817 | 5298926  | 5591168  | 1277440  | 257562   | 1152940  | C2 |
| 69   | O2L    | I | 801315  | 12124582 | 10075743 | 22174    | 6782324  | 9862567  |    |
| 69.5 | O3L    | I | 1161091 | 14315524 | 12328766 | 44027    | 1260273  | 4259365  |    |
| 70   | I1L    | I | 1174366 | 12530217 | 12772892 | 486581   | 31221695 | 24134410 |    |
| 71   | I2L    | L | 5498173 | 1397826  | 1377174  | 75047    | 1604016  | 1533140  |    |
| 72   | I3L    | E | 8351188 | 1586512  | 1282379  | 12105947 | 3390496  | 2115356  | C3 |
| 73   | I4L    | E | 296557  | 335737   | 512859   | 608112   | 153967   | 252043   | C3 |
| 74   | I5L    | I | 52594   | 787474   | 1105580  | 3936     | 2250773  | 2253044  |    |
| 75   | I6L    | I | 69730   | 449089   | 800189   | 74942    | 283133   | 350573   |    |
| 76   | I7L    | L | 20884   | 562237   | 988341   | 16212    | 942417   | 839467   |    |
| 77   | I8R    | I | 25270   | 98708    | 139866   | 17235    | 157148   | 131904   |    |
| 78   | G1L    | L | 15394   | 960116   | 784063   | 2153     | 427303   | 481604   |    |
| 79   | G3L    | L | 39281   | 3029291  | 1954743  | 842      | 583199   | 694346   |    |
| 80   | G2R    | E | 505344  | 209743   | 395268   | 247613   | 361217   | 282950   | C2 |
| 81   | G4L    | I | 17424   | 955840   | 949272   | 39171    | 6141198  | 5131012  |    |
| 82   | G5R    | E | 233386  | 131457   | 183814   | 378197   | 277832   | 240958   | C2 |
| 83   | G5.5R  | E | 1045976 | 404684   | 562250   | 2539875  | 1795704  | 1476212  | C2 |
| 84   | G6R    | L | 39129   | 245511   | 395716   | 4866     | 239635   | 475881   |    |
| 85   | G7L    | L | 8757    | 583522   | 518329   | 21884    | 1610729  | 949902   |    |
| 86   | G8R    | I | 227565  | 1955881  | 1993528  | 210778   | 7003060  | 6744316  |    |
| 87   | G9R    | L | 93814   | 865743   | 761375   | 1708     | 390492   | 823882   |    |
| 88   | L1R    | L | 104865  | 1142815  | 1074137  | 5375     | 1672623  | 1205264  |    |
| 89   | L2R    | E | 2777770 | 1453257  | 1186217  | 8753364  | 1818785  | 1392721  | C3 |

|     |        |   |         |         |         |          |          |          |    |
|-----|--------|---|---------|---------|---------|----------|----------|----------|----|
| 90  | L3R    | L | 4733    | 150427  | 247192  | 9941     | 558945   | 452472   |    |
| 91  | L4R    | I | 46756   | 1929025 | 2350341 | 23728    | 5884455  | 4013403  |    |
| 92  | L5R    | L | 47141   | 2646690 | 2342044 | 12746    | 897270   | 1267727  |    |
| 93  | J1R    | I | 31466   | 1412473 | 1453864 | 11665    | 1397801  | 1647902  |    |
| 94  | J2R    | E | 397700  | 1436374 | 1318202 | 1473374  | 398526   | 592748   | C3 |
| 95  | J3R    | E | 412750  | 1138422 | 1055005 | 939546   | 1040481  | 967085   | C2 |
| 96  | J4R    | E | 554783  | 737222  | 868557  | 903572   | 801410   | 568112   | C2 |
| 97  | J5L    | L | 2283    | 159850  | 276188  | 1635     | 379383   | 492818   |    |
| 98  | J6R    | E | 223299  | 361323  | 563879  | 248838   | 404102   | 356378   | C2 |
| 99  | H1L    | I | 163075  | 1623674 | 1166370 | 9365     | 2312266  | 2082363  |    |
| 100 | H2R    | L | 8570    | 181287  | 348969  | 3971     | 518943   | 410227   |    |
| 101 | H3L    | I | 83099   | 1204106 | 1028088 | 257072   | 3823617  | 3257006  |    |
| 102 | H4L    | L | 16506   | 301670  | 269341  | 15301    | 466439   | 326937   |    |
| 103 | H5R    | E | 7052193 | 2993318 | 2269673 | 19521388 | 15370215 | 13848524 | C2 |
| 104 | H6R    | L | 491070  | 2374081 | 1692753 | 11372    | 177260   | 1304411  |    |
| 105 | H7R    | I | 231820  | 1870272 | 1544432 | 139567   | 5770377  | 5156983  |    |
| 106 | D1R    | E | 1061724 | 1512512 | 1484651 | 813543   | 478455   | 532415   | C2 |
| 107 | D2R    | L | 15770   | 252350  | 524396  | 10689    | 838700   | 751596   |    |
| 108 | D3R    | L | 107791  | 465046  | 862524  | 101190   | 806150   | 628268   |    |
| 109 | D4R    | E | 403922  | 483349  | 765533  | 817703   | 355729   | 348484   | C3 |
| 110 | D5R    | E | 1252372 | 470709  | 681701  | 898670   | 443448   | 273173   | C3 |
| 111 | D6R    | I | 429695  | 353405  | 771035  | 17666    | 513171   | 327196   |    |
| 112 | D7R    | E | 389674  | 169406  | 282911  | 2845701  | 1315354  | 720497   | C3 |
| 113 | D8L    | I | 15947   | 2772906 | 1578355 | 2224     | 4870652  | 2101935  |    |
| 114 | D9R    | E | 554105  | 280925  | 550268  | 722088   | 370604   | 376055   | C2 |
| 115 | D10R   | I | 157158  | 266331  | 346214  | 16964    | 233318   | 173527   |    |
| 116 | D11L   | I | 349363  | 1270330 | 1595301 | 22756    | 472566   | 412975   |    |
| 117 | D12L   | E | 1117035 | 1893339 | 1855749 | 2834115  | 1238309  | 765674   | C3 |
| 118 | D13L   | I | 107756  | 2189044 | 2212955 | 52218    | 6811631  | 4826454  |    |
| 119 | A1L    | I | 104150  | 2227332 | 2447486 | 131730   | 2673809  | 1832801  |    |
| 120 | A2L    | I | 25204   | 1597385 | 1246505 | 46241    | 1405916  | 1643197  |    |
| 121 | A2.5L  | L | 11250   | 1062223 | 889737  | 33819    | 3489067  | 2907412  |    |
| 122 | A3L    | I | 123788  | 3862333 | 2077315 | 55162    | 5391692  | 3885839  |    |
| 123 | A4L    | E | 168293  | 1512785 | 933764  | 575401   | 7054288  | 4663898  | C1 |
| 124 | A5R    | E | 1068308 | 416698  | 267557  | 1564346  | 1184398  | 716296   | C2 |
| 125 | A6L    | I | 92764   | 1204834 | 1179065 | 113233   | 4876007  | 4445221  |    |
| 126 | A7L    | L | 14001   | 755061  | 1051375 | 11818    | 443812   | 436585   |    |
| 127 | A8R    | E | 532036  | 106018  | 173463  | 1127033  | 269426   | 160084   | C3 |
| 128 | A9L    | L | 16520   | 3571232 | 2525911 | 1395     | 935087   | 1060218  |    |
| 129 | A10L   | L | 35929   | 4357104 | 2772577 | 1593     | 4921299  | 3324909  |    |
| 130 | A11R   | L | 13226   | 153051  | 280246  | 8688     | 1291249  | 662114   |    |
| 131 | A12L   | I | 60866   | 6209783 | 4309871 | 111307   | 17138138 | 16613835 |    |
| 132 | A13L   | L | 19676   | 8923596 | 6707428 | 6213     | 12605197 | 12915930 |    |
| 133 | A14L   | L | 7284    | 2684170 | 2696829 | 4898     | 27674145 | 32690917 |    |
| 134 | A14.5L | L | 19050   | 2543060 | 2011436 | 817      | 489081   | 761842   |    |
| 135 | A15L   | I | 12814   | 1914538 | 1639820 | 12921    | 1037270  | 955085   |    |
| 136 | A16L   | I | 5554    | 2189691 | 1589965 | 5485     | 263963   | 610842   |    |

|       |             |    |         |         |         |         |          |          |    |
|-------|-------------|----|---------|---------|---------|---------|----------|----------|----|
| 137   | A17L        | L  | 8324    | 5559644 | 3675054 | 2975    | 11388463 | 10427057 |    |
| 138   | A18R        | E  | 144141  | 176355  | 311412  | 115615  | 740211   | 579110   | C1 |
| 139   | A19L        | I  | 1010    | 690366  | 820624  | 1736    | 11987935 | 12450056 |    |
| 140   | A21L        | L  | 1126    | 186545  | 219299  | 1341    | 987522   | 1292461  |    |
| 141   | A20R        | E  | 321905  | 237184  | 379567  | 304772  | 138771   | 160826   | C2 |
| 142   | A22R        | I  | 161318  | 139456  | 207577  | 19256   | 225989   | 364108   |    |
| 143   | A23R        | E  | 447662  | 199361  | 278524  | 1045321 | 381714   | 334144   | C3 |
| 144   | A24R        | E  | 429923  | 255683  | 296228  | 510922  | 680441   | 477703   | C2 |
| 145   | no ortholog | NA | 5606    | 1167094 | 861187  | 92      | 10695    | 51121    |    |
| 146   | no ortholog | I  | 7214    | 1121997 | 871058  | 1109    | 15417    | 73735    |    |
| 147   | no ortholog | I  | 8218    | 1467857 | 1365527 | 3282    | 399200   | 396471   |    |
| 148   | A25L        | I  | 12392   | 2648477 | 2191512 | 2139    | 5129769  | 5372078  |    |
| 149   | A26L        | L  | 24838   | 1943684 | 1887582 | 4159    | 405965   | 982290   |    |
| 150   | A27L        | I  | 23088   | 1110915 | 1382825 | 1781    | 7666086  | 5537669  |    |
| 151   | A28L        | L  | 73897   | 1098260 | 1228683 | 1676    | 373210   | 492570   |    |
| 152   | A29L        | E  | 753779  | 1436799 | 1769914 | 1302236 | 859654   | 1111617  | C2 |
| 153   | A30L        | I  | 189139  | 995181  | 1510217 | 782870  | 4002128  | 4160030  |    |
| 153.5 | A30.5L      | I  | 87796   | 685525  | 1763476 | 231167  | 2930854  | 3267310  |    |
| 154   | A31R        | E  | 517401  | 432773  | 789384  | 3151184 | 1877772  | 1406704  | C2 |
| 155   | A32L        | I  | 9432    | 200373  | 290882  | 7577    | 611707   | 424323   |    |
| 156   | A33R        | E  | 720800  | 1491949 | 1194111 | 2958359 | 5347738  | 6272456  | C1 |
| 157   | A34R        | I  | 25489   | 3006785 | 2341309 | 10711   | 9677241  | 6856780  |    |
| 158   | A35R        | E  | 722839  | 3363885 | 2015458 | 1651337 | 501737   | 1255978  | C2 |
| 159   | A36R        | E  | 397529  | 2368632 | 1377333 | 1101538 | 708159   | 957337   | C2 |
| 160   | A37R        | E  | 1273425 | 1688695 | 1223589 | 1442073 | 222065   | 450825   | C3 |
| 161   | pseudogene  | E  | 180786  | 575073  | 532751  | 321045  | 392572   | 500931   | C2 |
| 162   | A38L        | I  | 9307    | 151588  | 259566  | 7857    | 627994   | 311144   |    |
| 163   | A39R        | L  | 37151   | 676856  | 850193  | 1511    | 1129508  | 1605852  |    |
| 164   | A39R        | I  | 3614    | 400876  | 524590  | 1627    | 41622    | 241206   |    |
| 165   | A40R        | E  | 1518160 | 1908338 | 1928812 | 1854551 | 596143   | 746778   | C3 |
| 166   | A41L        | E  | 296219  | 102923  | 109041  | 694125  | 182955   | 133547   | C3 |
| 167   | A42R        | I  | 28663   | 688109  | 1551576 | 77110   | 5144071  | 18693389 |    |
| 168   | A43R        | I  | 132154  | 1397149 | 2604370 | 184683  | 591919   | 2803437  |    |
| 169   | 268         | E  | 406553  | 896124  | 1661179 | 2938905 | 710140   | 1314251  | C3 |
| 170   | A44L        | E  | 508131  | 105768  | 152537  | 865084  | 220048   | 190551   | C3 |
| 171   | A45R        | L  | 4311587 | 1529145 | 1778673 | 1395605 | 1171295  | 998590   |    |
| 172   | A46R        | E  | 2113260 | 896467  | 1118298 | 5931269 | 1043752  | 844270   | C3 |
| 173   | A47L        | E  | 299214  | 55273   | 67916   | 307980  | 103388   | 96768    | C3 |
| 174   | A48R        | E  | 1061947 | 367552  | 555958  | 3038483 | 600030   | 417873   | C3 |
| 175   | A49R        | E  | 284676  | 588505  | 1014293 | 385496  | 773753   | 845609   | C1 |
| 176   | A50R        | E  | 718140  | 660184  | 923440  | 800414  | 950202   | 417335   | C2 |
| 177   | A51R        | E  | 1222103 | 348435  | 496548  | 3098622 | 528585   | 381312   | C3 |
| 178   | A52R        | E  | 927243  | 254833  | 526397  | 2042687 | 277454   | 226207   | C3 |
| 179   | A53R        | I  | 21857   | 148039  | 451360  | 20783   | 560741   | 994020   |    |
| 180   | A55R        | E  | 191469  | 291835  | 473262  | 237267  | 253790   | 285565   | C2 |
| 181   | A56R        | E  | 366770  | 956266  | 815688  | 458961  | 1951726  | 1646120  | C1 |
| 181.5 | 269         | E  | 294413  | 760627  | 749160  | 310981  | 3535077  | 5149865  | C1 |

|              |             |   |         |         |         |         |         |         |    |
|--------------|-------------|---|---------|---------|---------|---------|---------|---------|----|
| <b>182</b>   | A57R        | E | 287252  | 1095302 | 1002605 | 47043   | 196238  | 793087  | C1 |
| <b>183</b>   | B1R         | E | 991186  | 1256744 | 1097872 | 1273070 | 563660  | 601138  | C3 |
| <b>184</b>   | B2R         | E | 1173341 | 603783  | 685004  | 2789182 | 431659  | 699700  | C3 |
| <b>185</b>   | B3R         | E | 2050765 | 588372  | 800591  | 9796    | 11663   | 96495   | C1 |
| <b>186</b>   | B4R         | I | 14210   | 288740  | 723875  | 4819    | 142331  | 220352  |    |
| <b>187</b>   | B5R         | E | 151253  | 772810  | 757704  | 417202  | 4681562 | 3693192 | C1 |
| <b>188</b>   | B6R         | E | 1102830 | 1677419 | 1337314 | 1410175 | 448432  | 504194  | C3 |
| <b>189</b>   | B7R         | L | 59185   | 1027987 | 1010858 | 12651   | 1322293 | 1416699 |    |
| <b>190</b>   | B8R         | E | 1889369 | 1033616 | 840723  | 4607454 | 759706  | 784156  | C3 |
| <b>191</b>   | B9R         | I | 34854   | 271007  | 315067  | 80208   | 136518  | 206380  |    |
| <b>192</b>   | B10R        | I | 25214   | 269512  | 300480  | 41352   | 88697   | 140869  |    |
| <b>193</b>   | B11R        | E | 82505   | 352864  | 439448  | 492935  | 301437  | 421119  | C2 |
| <b>194</b>   | B12R        | E | 1328487 | 426387  | 388670  | 2749046 | 485193  | 365199  | C3 |
| <b>195</b>   | B13R        | E | 868629  | 265478  | 294084  | 1707217 | 346419  | 359793  | C3 |
| <b>196</b>   | B15R        | E | 472271  | 285360  | 635106  | 1303010 | 524120  | 1362572 | C2 |
| <b>197</b>   | B16R        | I | 4588    | 414993  | 591756  | 1735    | 1968679 | 2394585 |    |
| <b>198</b>   | B17L        | E | 109352  | 143567  | 250023  | 136550  | 202128  | 170006  | C2 |
| <b>199</b>   | B18R        | E | 97573   | 329944  | 684934  | 110428  | 157229  | 208087  | C2 |
| <b>200</b>   | B19R        | E | 3977197 | 1050352 | 1191824 | 6446599 | 2317674 | 1861509 | C3 |
| <b>201</b>   | pseudogene  | E | 566750  | 766827  | 1196745 | 642751  | 222350  | 358917  | C3 |
| <b>202</b>   | B20R        | E | 162198  | 299707  | 478686  | 102138  | 150263  | 341847  | C1 |
| <b>203</b>   | B20R        | E | 409947  | 438957  | 756170  | 48056   | 69511   | 101181  | C2 |
| <b>204</b>   | no ortholog | E | 416918  | 366833  | 719099  | 16585   | 88099   | 100312  | C1 |
| <b>204.5</b> | 264         | I | 7253    | 207868  | 348923  | 2202    | 836367  | 771509  |    |
| <b>205</b>   | C12L        | E | 127193  | 335465  | 751473  | 214503  | 387178  | 329736  | C2 |
| <b>206</b>   | C13L, C14L  | I | 39690   | 292268  | 557145  | 68266   | 980789  | 1011903 |    |

\* The mRNA and ribosome footprint reads were normalized by total reads and ORF length. The threshold minimum for translation was 100,000 reads at the early or post-replicative stage.

\*\* The classification was according to Yang et al. (1, 2).

**TABLE S2.** Translation initiation sites (TIS) of previously annotated VACV ORFs

| VACV-WR ORF                   | VACV-COP    | Expression stage* | Strand | Annotated start codon | TIS Peak (HTN*****) | Peak counts (HTN) | Distance** (HTN) | TIS peak (LTM*****) | Peak counts (LTM) | Distance** (LTM) |
|-------------------------------|-------------|-------------------|--------|-----------------------|---------------------|-------------------|------------------|---------------------|-------------------|------------------|
| <b>001/218*** (4398-4225)</b> | C23L        | E                 | -      | 4375                  | 4398                | 11854             | 23               | 4401                | 20065             | 26               |
| <b>002/217</b>                | pseudogene  | E                 | -      | 4974                  | ND****              |                   |                  | ND                  |                   |                  |
| <b>004/215</b>                | C22L        | E                 | -      | 5460                  | ND                  |                   |                  | ND                  |                   |                  |
| <b>005/214</b>                | pseudogene  | E                 | -      | 5724                  | ND                  |                   |                  | ND                  |                   |                  |
| <b>006/213</b>                | C21L        | E                 | -      | 6155                  | ND                  |                   |                  | ND                  |                   |                  |
| <b>007/212</b>                | no ortholog | E                 | -      | 6417                  | ND                  |                   |                  | ND                  |                   |                  |
| <b>009/210</b>                | C11R        | E                 | +      | 7333                  | 7323                | 27571             | 10               | 7323                | 55911             | 10               |
| <b>010/209</b>                | C10L        | E                 | -      | 8905                  | ND                  |                   |                  | 8910                | 3039              | 5                |
| <b>011/208</b>                | no ortholog | E                 | +      | 9417                  | 9404                | 4385              | 13               | 9404                | 6226              | 13               |
| <b>012/207</b>                | no ortholog | E                 | +      | 9937                  | ND                  |                   |                  | ND                  |                   |                  |
| <b>13</b>                     | no ortholog | E                 | -      | 10671                 | 10683               | 14938             | 12               | 10686               | 2589              | 15               |
| <b>14</b>                     | no ortholog | E                 | -      | 11443                 | ND                  |                   |                  | ND                  |                   |                  |
| <b>15</b>                     | no ortholog | E                 | -      | 11945                 | ND                  |                   |                  | ND                  |                   |                  |
| <b>16</b>                     | no ortholog | E                 | -      | 12445                 | ND                  |                   |                  | ND                  |                   |                  |
| <b>17</b>                     | no ortholog | E                 | -      | 12682                 | ND                  |                   |                  | ND                  |                   |                  |
| <b>18</b>                     | no ortholog | E                 | -      | 12991                 | 13004               | 72795             | 13               | 13004               | 65167             | 13               |
| <b>19</b>                     | C9L         | E                 | -      | 15068                 | 15081               | 1218              | 13               | 15068               | 1450              | 0                |
| <b>21</b>                     | C7L         | E                 | -      | 16168                 | 16181               | 1747              | 13               | 16163               | 1331              | -5               |
| <b>22</b>                     | C6L         | E                 | -      | 16856                 | 16868               | 14907             | 12               | 16859               | 13205             | 3                |
| <b>23</b>                     | C5L         | E                 | -      | 17597                 | 17610               | 6384              | 13               | 17603               | 14158             | 6                |
| <b>24</b>                     | C4L         | E                 | -      | 18610                 | 18622               | 3585              | 12               | 18622               | 8218              | 12               |
| <b>26</b>                     | C2L         | E                 | -      | 21073                 | 21086               | 2071              | 13               | 21086               | 4010              | 13               |
| <b>27</b>                     | C1L         | E                 | -      | 21832                 | ND                  |                   |                  | ND                  |                   |                  |
| <b>28</b>                     | N1L         | E                 | -      | 22172                 | 22181               | 19510             | 9                | 22181               | 39263             | 9                |
| <b>29</b>                     | N2L         | E                 | -      | 22836                 | 22846               | 9876              | 10               | 22846               | 12196             | 10               |
| <b>30</b>                     | M1L         | E                 | -      | 24296                 | ND                  |                   |                  | ND                  |                   |                  |
| <b>31</b>                     | M2L         | E                 | -      | 24936                 | 24948               | 11887             | 12               | 24949               | 16475             | 13               |
| <b>32</b>                     | K1L         | E                 | -      | 25925                 | 25940               | 2600              | 15               | 25925               | 72304             | 0                |
| <b>34</b>                     | K3L         | E                 | -      | 27572                 | 27585               | 10197             | 13               | 27569               | 24770             | -3               |
| <b>36</b>                     | pseudogene  | E                 | -      | 29060                 | ND                  |                   |                  | ND                  |                   |                  |
| <b>37</b>                     | K5L         | E                 | -      | 29479                 | ND                  |                   |                  | ND                  |                   |                  |

|                     |        |   |   |       |       |       |     |       |       |     |
|---------------------|--------|---|---|-------|-------|-------|-----|-------|-------|-----|
| 38                  | K6L    | E | - | 29693 | 29706 | 5585  | 13  | 29688 | 2647  | -5  |
| 39                  | K7R    | E | + | 29832 | 29820 | 4260  | 12  | 29832 | 4856  | 0   |
| 40                  | F1L    | E | - | 31026 | 31038 | 3067  | 12  | 31038 | 1836  | 12  |
| 41                  | F2L    | E | - | 31481 | ND    |       |     | 31480 | 5633  | -1  |
| 42                  | F3L    | E | - | 32947 | ND    |       |     | ND    |       |     |
| 43                  | F4L    | E | - | 33917 | 33930 | 10507 | 13  | 33930 | 18421 | 13  |
| 44                  | F5L    | E | - | 34917 | 34930 | 2067  | 13  | 34930 | 3317  | 13  |
| 45                  | F6L    | E | - | 35171 | 35184 | 1041  | 13  | 35184 | 832   | 13  |
| 046***(35417-35187) | F7L    | E | - | 35429 | 35429 | 6975  | 0   | 35429 | 3958  | 0   |
| 47                  | F8L    | E | - | 35774 | 35786 | 3569  | 12  | 35774 | 6722  | 0   |
| 50                  | F11L   | E | - | 38847 | 38860 | 21913 | 13  | 38860 | 1820  | 13  |
| 51                  | F12L   | E | - | 40797 | 40809 | 12980 | 12  | 40800 | 26110 | 3   |
| 53                  | F14L   | E | - | 42188 | 42200 | 12987 | 12  | 42186 | 8630  | -2  |
| 53.5                | F14.5L | E | - | 42387 | ND    |       |     | 42386 | 1136  | -1  |
| 54                  | F15L   | E | - | 42903 | 42915 | 1519  | 12  | 42902 | 4205  | -1  |
| 55                  | F16L   | E | - | 43639 | 43651 | 4933  | 12  | 43651 | 4145  | 12  |
| 57                  | E1L    | E | - | 45443 | 43455 | 1375  | 12  | 43449 | 2231  | 6   |
| 58                  | E2L    | E | - | 47653 | 47665 | 1480  | 12  | 47665 | 1364  | 12  |
| 59                  | E3L    | E | - | 48352 | 48366 | 31045 | 14  | 48352 | 72491 | 0   |
| 60                  | E4L    | E | - | 49187 | 49200 | 15617 | 13  | 49187 | 17713 | 0   |
| 061***(49329-50261) | E5R    | E | + | 49236 | 49316 | 2985  | -80 | 49316 | 3014  | -80 |
| 65                  | E9R    | E | - | 56656 | 56655 | 1236  | -1  | 56655 | 21257 | -1  |
| 68                  | O1L    | E | - | 59346 | 59357 | 2847  | 11  | 59349 | 13044 | 3   |
| 72                  | I3L    | E | - | 61842 | 61855 | 44232 | 13  | 61840 | 99999 | -2  |
| 73                  | I4L    | E | - | 64240 | 64253 | 4063  | 13  | 64240 | 14831 | 0   |
| 80                  | G2R    | E | + | 71078 | 71065 | 354   | 13  | 71075 | 527   | 3   |
| 82                  | G5R    | E | + | 72087 | 72075 | 583   | 12  | 72084 | 1383  | 3   |
| 83                  | G5.5R  | E | + | 73399 | 73386 | 9275  | 13  | 73386 | 6201  | 13  |
| 89                  | L2R    | E | + | 77809 | 77797 | 14021 | 12  | 77802 | 25186 | 7   |
| 94                  | J2R    | E | + | 80724 | 80724 | 785   | 0   | 80724 | 10403 | 0   |
| 95                  | J3R    | E | + | 81323 | 81311 | 3885  | 12  | 81311 | 4606  | 12  |
| 96                  | J4R    | E | + | 82239 | 82232 | 1290  | 7   | 82240 | 741   | -1  |
| 98                  | J6R    | E | + | 83365 | 83351 | 1456  | 14  | 83366 | 2265  | -1  |
| 103                 | H5R    | E | + | 91871 | 91859 | 83606 | 12  | 91859 | 99999 | 12  |
| 106                 | D1R    | E | + | 93948 | 93934 | 3999  | 14  | 93942 | 11024 | 6   |

|                               |            |   |   |        |        |       |     |        |       |     |
|-------------------------------|------------|---|---|--------|--------|-------|-----|--------|-------|-----|
| 109                           | D4R        | E | + | 97587  | 97575  | 6698  | 12  | 97575  | 11600 | 12  |
| 110                           | D5R        | E | + | 98275  | 98276  | 1299  | -1  | 98278  | 6882  | -3  |
| 112                           | D7R        | E | + | 102613 | 102614 | 1720  | -1  | 102614 | 14683 | -1  |
| 114                           | D9R        | E | + | 104017 | 104007 | 1192  | 10  | 104017 | 3352  | 0   |
| 117                           | D12L       | E | - | 108195 | 108194 | 1535  | -1  | 108192 | 25841 | -3  |
| 123                           | A4L        | E | - | 114126 | 114138 | 926   | 12  | ND     |       |     |
| 124                           | A5R        | E | + | 114164 | 114165 | 1482  | -1  | 114165 | 1674  | -1  |
| 127                           | A8R        | E | + | 117983 | 117970 | 3801  | 13  | 117973 | 16225 | 10  |
| 138                           | A18R       | E | + | 126209 | 126210 | 199   | -1  | 126210 | 843   | -1  |
| 141                           | A20R       | E | + | 128257 | 128251 | 3401  | 6   | 128251 | 3980  | 6   |
| 143                           | A23R       | E | + | 130050 | 130037 | 4940  | 13  | 130050 | 1092  | 0   |
| 144***<br>(131219-<br>134689) | A24R       | E | + | 131195 | 131219 | 5414  | -24 | 131224 | 40139 | -24 |
| 152                           | A29L       | E | - | 141704 | 141716 | 12821 | 12  | 141704 | 13225 | 0   |
| 154                           | A31R       | E | + | 142060 | 142047 | 4499  | 13  | 142060 | 8712  | 0   |
| 156                           | A33R       | E | + | 143331 | 143321 | 9209  | 10  | 143319 | 11737 | 12  |
| 158                           | A35R       | E | + | 144462 | 144451 | 994   | 11  | 144462 | 22607 | 0   |
| 159                           | A36R       | E | + | 145059 | 145048 | 1782  | 11  | 145060 | 4301  | -1  |
| 160                           | A37R       | E | + | 145788 | 145775 | 18295 | 13  | 145775 | 7752  | 13  |
| 161                           | pseudogene | E | + | 146669 | 146658 | 1143  | 11  | ND     |       |     |
| 165                           | A40R       | E | + | 148928 | 148914 | 7480  | 14  | 148922 | 6827  | 6   |
| 166                           | A41L       | E | - | 150164 | 150176 | 2464  | 12  | 150174 | 6437  | 10  |
| 169                           | 268        | E | + | 151359 | ND     |       |     | ND     |       |     |
| 170                           | A44L       | E | - | 152733 | 152745 | 5483  | 12  | 152737 | 9607  | 4   |
| 172                           | A46R       | E | + | 153147 | 153135 | 11555 | 12  | 153141 | 33859 | 6   |
| 173                           | A47L       | E | - | 154675 | 154687 | 4145  | 12  | 154680 | 2923  | 5   |
| 174***<br>(154775-<br>155289) | A48R       | E | + | 154706 | 154775 | 1124  | -69 | 154776 | 20562 | -70 |
| 175                           | A49R       | E | + | 155437 | 155424 | 1120  | 13  | 155436 | 2421  | 1   |
| 176                           | A50R       | E | + | 155958 | 155959 | 636   | -1  | 155959 | 7510  | -1  |
| 177                           | A51R       | E | + | 157669 | 157655 | 2932  | 14  | 157674 | 7101  | -5  |
| 178                           | A52R       | E | + | 158743 | 158730 | 5548  | 13  | 158740 | 16519 | 3   |
| 180                           | A55R       | E | + | 160439 | 160427 | 1097  | 12  | 160427 | 2715  | 12  |
| 181                           | A56R       | E | + | 162183 | ND     |       |     | 162176 | 3442  | 7   |
| 181.5                         | 269        | E | + | 163145 | 163132 | 490   | 13  | 163148 | 1279  | -3  |
| 182                           | A57R       | E | + | 163272 | ND     |       |     | ND     |       |     |



|             |             |   |   |        |        |       |    |        |       |    |
|-------------|-------------|---|---|--------|--------|-------|----|--------|-------|----|
| <b>183</b>  | B1R         | E | + | 163878 | 163866 | 5879  | 12 | 163866 | 8545  | 12 |
| <b>184</b>  | B2R         | E | + | 164870 | 164858 | 27118 | 12 | 164858 | 43669 | 12 |
| <b>185</b>  | B3R         | E | + | 165565 | ND     |       |    | ND     |       |    |
| <b>187</b>  | B5R         | E | + | 168374 | 168362 | 633   | 12 | 168375 | 1079  | -1 |
| <b>188</b>  | B6R         | E | + | 169409 | 169397 | 3004  | 12 | 169397 | 14713 | 12 |
| <b>190</b>  | B8R         | E | + | 170571 | 170559 | 33238 | 12 | 170565 | 35961 | 6  |
| <b>193</b>  | B11R        | E | + | 172244 | 172232 | 4020  | 12 | 172232 | 3599  | 12 |
| <b>194</b>  | B12R        | E | + | 172529 | 172519 | 5493  | 10 | 172529 | 7958  | 0  |
| <b>195</b>  | B13R        | E | + | 173473 | 173461 | 9170  | 12 | 173462 | 22972 | 11 |
| <b>196</b>  | B15R        | E | + | 174585 | 174572 | 9177  | 13 | 174583 | 11567 | 2  |
| <b>198</b>  | B17L        | E | - | 177166 | 177179 | 242   | 13 | ND     |       |    |
| <b>199</b>  | B18R        | E | + | 177306 | 177294 | 1172  | 12 | 177300 | 2646  | 6  |
| <b>200</b>  | B19R        | E | + | 179102 | 179090 | 25882 | 12 | 179099 | 58039 | 3  |
| <b>201</b>  | pseudogene  | E | + | 180315 | 180302 | 1085  | 13 | 180311 | 1249  | 4  |
| <b>202</b>  | B20R        | E | + | 180482 | ND     |       |    | ND     |       |    |
| <b>203</b>  | B20R        | E | + | 180898 | ND     |       |    | ND     |       |    |
| <b>204</b>  | no ortholog | E | + | 181839 | ND     |       |    | ND     |       |    |
| <b>205</b>  | C12L        | E | + | 182511 | 182498 | 630   | 10 | 182511 | 760   | 0  |
| <b>33</b>   | K2L         | I | - | 27256  | 27269  | 6314  | 13 |        |       |    |
| <b>35</b>   | K4L         | I | - | 28898  | 28911  | 2967  | 13 |        |       |    |
| <b>52</b>   | F13L        | I | - | 41949  | 41948  | 52838 | -1 |        |       |    |
| <b>62</b>   | E6R         | I | + | 50398  | 50386  | 4967  | 12 |        |       |    |
| <b>63</b>   | E7R         | I | + | 52183  | 52184  | 8917  | -1 |        |       |    |
| <b>64</b>   | E8R         | I | + | 52808  | 52804  | 2770  | 4  |        |       |    |
| <b>67</b>   | E11R        | I | - | 57359  | 57358  | 7987  | -1 |        |       |    |
| <b>69</b>   | O2L         | I | - | 59720  | 59727  | 31476 | 7  |        |       |    |
| <b>69.5</b> | O3L         | I | - | 59851  | 59852  | 1367  | 1  |        |       |    |
| <b>70</b>   | I1L         | I | - | 60804  | 60803  | 99999 | -1 |        |       |    |
| <b>74</b>   | I5L         | I | - | 64506  | 64506  | 4300  | 0  |        |       |    |
| <b>75</b>   | I6L         | I | - | 65673  | 65685  | 1667  | 12 |        |       |    |
| <b>77</b>   | I8R         | I | + | 66943  | 66936  | 717   | 7  |        |       |    |
| <b>81</b>   | G4L         | I | - | 72084  | ND     |       |    |        |       |    |
| <b>86</b>   | G8R         | I | + | 75200  | 75201  | 69076 | -1 |        |       |    |
| <b>91</b>   | L4R         | I | + | 79139  | 79139  | 11431 | 0  |        |       |    |
| <b>93</b>   | J1R         | I | + | 80247  | 80249  | 9017  | -2 |        |       |    |

|              |             |  |   |        |        |       |    |
|--------------|-------------|--|---|--------|--------|-------|----|
| <b>99</b>    | H1L         |  | - | 87737  | 87736  | 18985 | -1 |
| <b>101</b>   | H3L         |  | - | 89297  | 89297  | 31256 | 0  |
| <b>105</b>   | H7R         |  | + | 93464  | 93465  | 10804 | -1 |
| <b>111</b>   | D6R         |  | + | 100673 | 100674 | 1753  | -1 |
| <b>113</b>   | D8L         |  | - | 103975 | ND     |       |    |
| <b>115</b>   | D10R        |  | + | 104655 | 104656 | 5250  | -1 |
| <b>116</b>   | D11L        |  | - | 107297 | 107296 | 2044  | -1 |
| <b>118</b>   | D13L        |  | - | 109881 | 109887 | 49377 | 6  |
| <b>119</b>   | A1L         |  | - | 110357 | 110356 | 11614 | -1 |
| <b>120</b>   | A2L         |  | - | 111052 | 111064 | 13931 | 12 |
| <b>122</b>   | A3L         |  | - | 113228 | 113228 | 38153 | 0  |
| <b>125</b>   | A6L         |  | - | 115773 | 115775 | 34123 | 2  |
| <b>131</b>   | A12L        |  | - | 123395 | 123394 | 99999 | -1 |
| <b>135</b>   | A15L        |  | - | 124463 | 124462 | 1083  | -1 |
| <b>136</b>   | A16L        |  | - | 125580 | 125579 | 1294  | -1 |
| <b>139</b>   | A19L        |  | - | 127904 | 127903 | 4677  | -1 |
| <b>142</b>   | A22R        |  | + | 129467 | 129455 | 603   | 12 |
| <b>146</b>   | no ortholog |  | - | 135324 | ND     |       |    |
| <b>147</b>   | no ortholog |  | - | 136279 | ND     |       |    |
| <b>148</b>   | A25L        |  | - | 138416 | 138415 | 4410  | -1 |
| <b>150</b>   | A27L        |  | - | 140345 | 140344 | 37803 | -1 |
| <b>153</b>   | A30L        |  | - | 141900 | 141899 | 10254 | -1 |
| <b>153.5</b> | A30.5L      |  | - | 142052 | 142051 | 3154  | -1 |
| <b>155</b>   | A32L        |  | - | 143213 | 143220 | 2990  | 7  |
| <b>157</b>   | A34R        |  | + | 143912 | 143913 | 24362 | -1 |
| <b>162</b>   | A38L        |  | - | 147687 | 147687 | 3127  | 0  |
| <b>164</b>   | A39R        |  | + | 148474 | ND     |       |    |
| <b>167</b>   | A42R        |  | + | 150328 | 150325 | 10228 | 3  |
| <b>168</b>   | A43R        |  | + | 150767 | 150768 | 1707  | -1 |
| <b>179</b>   | A53R        |  | + | 159621 | ND     |       |    |
| <b>186</b>   | B4R         |  | + | 166594 | 166594 | 375   | 0  |
| <b>191</b>   | B9R         |  | + | 171476 | ND     |       |    |
| <b>192</b>   | B10R        |  | + | 171672 | ND     |       |    |
| <b>197</b>   | B16R        |  | + | 175118 | 175114 | 3094  | 4  |
| <b>204.5</b> | 264         |  | - | 182469 | 182471 | 1490  | 2  |

|                |            |   |   |        |        |       |    |
|----------------|------------|---|---|--------|--------|-------|----|
| <b>206</b>     | C13L, C14L | I | + | 183734 | 183735 | 21015 | -1 |
| <b>008/211</b> | C19L       | L | - | 7060   | ND     |       |    |
| <b>20</b>      | C8L        | L | - | 15644  | 15656  | 8297  | 12 |
| <b>25</b>      | C3L        | L | - | 19468  | 19469  | 23922 | 1  |
| <b>48</b>      | F9L        | L | - | 36472  | 36472  | 2957  | 0  |
| <b>49</b>      | F10L       | L | - | 37778  | 37777  | 897   | -1 |
| <b>56</b>      | F17R       | L | + | 43702  | 43702  | 34350 | 0  |
| <b>66</b>      | E10R       | L | + | 56688  | 56689  | 4487  | -1 |
| <b>71</b>      | I2L        | L | - | 61032  | 61031  | 8671  | -1 |
| <b>76</b>      | I7L        | L | - | 66937  | 66936  | 7314  | -1 |
| <b>78</b>      | G1L        | L | - | 70752  | 70751  | 1357  | -1 |
| <b>79</b>      | G3L        | L | - | 71084  | ND     |       |    |
| <b>84</b>      | G6R        | L | + | 73592  | ND     |       |    |
| <b>85</b>      | G7L        | L | - | 75169  | 75168  | 3477  | -1 |
| <b>87</b>      | G9R        | L | + | 76002  | ND     |       |    |
| <b>88</b>      | L1R        | L | + | 77025  | 77026  | 1367  | -1 |
| <b>90</b>      | L3R        | L | - | 79114  | 79113  | 4344  | -1 |
| <b>92</b>      | L5R        | L | + | 79904  | 79905  | 703   | -1 |
| <b>97</b>      | J5L        | L | - | 83258  | 83254  | 1687  | -4 |
| <b>100</b>     | H2R        | L | + | 87751  | 87752  | 2637  | -1 |
| <b>102</b>     | H4L        | L | - | 91685  | 91684  | 5784  | -1 |
| <b>104</b>     | H6R        | L | + | 92483  | 92484  | 500   | -1 |
| <b>107</b>     | D2R        | L | - | 96881  | 96894  | 273   | 13 |
| <b>108</b>     | D3R        | L | + | 96874  | ND     |       |    |
| <b>121</b>     | A2.5L      | L | - | 111279 | 111278 | 24612 | -1 |
| <b>126</b>     | A7L        | L | - | 117929 | 117930 | 5327  | 1  |
| <b>128</b>     | A9L        | L | - | 119168 | 119167 | 3824  | -1 |
| <b>129</b>     | A10L       | L | - | 121844 | 121843 | 74790 | -1 |
| <b>130</b>     | A11R       | L | + | 121859 | 121860 | 1760  | -1 |
| <b>132</b>     | A13L       | L | - | 123631 | 123630 | 21555 | -1 |
| <b>133</b>     | A14L       | L | - | 124011 | 124010 | 54995 | -1 |
| <b>134</b>     | A14.5L     | L | - | 124189 | 124189 | 2677  | 0  |
| <b>137</b>     | A17L       | L | - | 126194 | 126193 | 53588 | -1 |
| <b>140</b>     | A21L       | L | - | 128258 | ND     |       |    |
| <b>149</b>     | A26L       | L | - | 139963 | 139962 | 2254  | -1 |

|                              |             |   |   |        |        |      |      |
|------------------------------|-------------|---|---|--------|--------|------|------|
| <b>151</b>                   | A28L        | L | - | 140786 | ND     |      |      |
| <b>163***(147704-148477)</b> | A39R        | L | + | 147590 | 147704 | 1833 | -114 |
| <b>171</b>                   | A45R        | L | + | 152780 | ND     |      |      |
| <b>189</b>                   | B7R         | L | + | 169968 | 169969 | 5140 | -1   |
| <b>003/216</b>               | no ortholog |   | + | 4919   | ND     |      |      |
| <b>145</b>                   | no ortholog |   | - | 134891 | ND     |      |      |

\* The classification was according to Yang et al. (1, 2).

\*\*Distance between peak and annotated start codon

\*\*\*TIS identification resulted in a correction of the ORF annotation with start and stop codons following the ORF

\*\*\*\*Not Detected

\*\*\*\*\*HTN, Harringtonine; LTM, Lactimidomycin

**TABLE S3.** ORFs associated with newly identified translation initiation sites (TISs)

| TIS*  | Strand | Read count | Start codon | ORF length (amino acids) | ORF type** |
|-------|--------|------------|-------------|--------------------------|------------|
| 8     | +      | 4567       | ATA         | 1                        | nORF       |
| 74    | +      | 1270       | ATA         | 1                        | nORF       |
| 129   | +      | 7901       | ATG         | 4                        | nORF       |
| 4388  | -      | 29055      | ATA         | 47                       | dORF       |
| 4390  | -      | 36390      | ATA         | 249                      | tORF       |
| 4398  | -      | 11854      | ATG         | 57                       | cORF       |
| 4441  | -      | 9666       | AGG         | 2                        | uORF       |
| 5446  | -      | 1263       | ATA         | 27                       | dORF       |
| 7152  | -      | 1317       | ATT         | 9                        | nORF       |
| 7173  | -      | 6948       | ATG         | 16                       | nORF       |
| 7299  | +      | 8032       | CTG         | 31                       | uORF       |
| 7322  | +      | 27571      | ATC         | 6                        | uORF       |
| 7560  | +      | 6931       | AGG         | 2                        | dORF       |
| 8427  | -      | 1123       | ATA         | 4                        | dORF       |
| 8429  | -      | 1050       | ATA         | 1                        | dORF       |
| 8465  | -      | 1213       | ACG         | 1                        | dORF       |
| 8476  | -      | 1424       | GTG         | 188                      | tORF       |
| 9276  | -      | 2060       | ATT         | 8                        | nORF       |
| 9300  | -      | 1403       | ATG         | 16                       | nORF       |
| 10518 | -      | 2264       | ATG         | 75                       | tORF       |
| 10622 | -      | 2014       | ATG         | 11                       | dORF       |
| 12712 | -      | 2040       | ATA         | 81                       | tORF       |
| 12716 | -      | 2624       | GTG         | 13                       | uORF       |
| 12924 | -      | 20275      | ATA         | 22                       | dORF       |
| 12946 | -      | 21965      | ATC         | 45                       | tORF       |
| 12980 | -      | 13391      | AGG         | 2                        | dORF       |
| 13034 | -      | 1145       | GTG         | 13                       | uORF       |
| 13081 | -      | 34893      | ATA         | 6                        | nORF       |
| 13123 | -      | 10028      | ATT         | 9                        | nORF       |
| 13161 | -      | 1794       | ATA         | 9                        | nORF       |
| 14486 | +      | 4194       | ATG         | 1                        | nORF       |
| 15598 | +      | 1390       | AAG         | 19                       | nORF       |
| 15663 | -      | 14931      | ATT         | 10                       | nORF       |
| 15669 | -      | 13068      | ATT         | 12                       | nORF       |
| 16288 | -      | 11711      | ATT         | 2                        | nORF       |
| 16299 | -      | 3814       | ATG         | 12                       | nORF       |
| 16846 | -      | 4974       | ATA         | 8                        | dORF       |
| 16884 | -      | 2035       | ACG         | 6                        | uORF       |
| 17588 | -      | 2794       | ATG         | 201                      | tORF       |
| 18595 | -      | 1802       | ATA         | 311                      | tORF       |
| 19282 | -      | 8367       | ATG         | 201                      | tORF       |
| 19298 | -      | 11559      | ATA         | 11                       | dORF       |
| 19376 | -      | 12101      | ATT         | 1                        | dORF       |
| 19394 | -      | 7847       | ACG         | 3                        | dORF       |
| 19429 | -      | 12141      | ATA         | 250                      | tORF       |
| 19790 | -      | 1147       | ATG         | 8                        | dORF       |
| 22152 | -      | 75260      | ATA         | 6                        | dORF       |
| 22182 | -      | 19510      | ATT         | 9                        | uORF       |
| 22320 | -      | 3456       | AAG         | 6                        | nORF       |
| 22433 | -      | 3311       | AAG         | 8                        | dORF       |
| 22802 | -      | 7567       | AAG         | 2                        | dORF       |

|       |   |       |     |     |      |
|-------|---|-------|-----|-----|------|
| 22821 | - | 1550  | ATG | 170 | tORF |
| 24181 | - | 1250  | ATG | 8   | dORF |
| 24196 | - | 1210  | ATT | 13  | dORF |
| 24221 | - | 1260  | ATG | 447 | tORF |
| 24273 | - | 1303  | ATT | 7   | dORF |
| 24740 | - | 4118  | ATG | 3   | dORF |
| 25861 | - | 2977  | ATG | 16  | dORF |
| 25914 | - | 52781 | ACG | 2   | dORF |
| 26031 | - | 18958 | ATG | 3   | nORF |
| 26145 | - | 1047  | ATG | 4   | nORF |
| 26196 | - | 2557  | ATG | 21  | dORF |
| 26294 | - | 1790  | AGG | 18  | dORF |
| 27210 | - | 5534  | ATC | 10  | dORF |
| 27245 | - | 4064  | ATT | 25  | dORF |
| 27414 | - | 2355  | ATA | 1   | dORF |
| 27516 | - | 5624  | ATA | 12  | dORF |
| 27527 | - | 2206  | AAG | 73  | tORF |
| 27556 | - | 22095 | ATT | 8   | dORF |
| 27652 | - | 5165  | AAG | 15  | dORF |
| 27665 | - | 22079 | ATA | 13  | tORF |
| 27685 | - | 22052 | ATG | 26  | dORF |
| 27947 | - | 1653  | ATT | 107 | tORF |
| 28859 | - | 1683  | ATT | 410 | tORF |
| 28958 | - | 3110  | ATA | 10  | tORF |
| 29659 | - | 1673  | ATT | 13  | dORF |
| 29662 | - | 2077  | ATG | 14  | dORF |
| 29678 | - | 1013  | ATG | 1   | dORF |
| 29707 | - | 2780  | ATA | 1   | uORF |
| 29730 | - | 3130  | ACG | 3   | uORF |
| 29851 | + | 1123  | ATG | 22  | dORF |
| 30889 | - | 1113  | ATA | 1   | dORF |
| 30989 | - | 1176  | ATG | 1   | dORF |
| 31041 | - | 1317  | ATA | 231 | tORF |
| 31060 | - | 2230  | TTG | 10  | dORF |
| 31078 | - | 1293  | ATA | 16  | dORF |
| 31102 | - | 1307  | AAG | 4   | dORF |
| 31109 | - | 3444  | CTG | 23  | tORF |
| 31132 | - | 2714  | ATC | 14  | dORF |
| 31162 | - | 2477  | ATA | 5   | dORF |
| 31179 | - | 2868  | ATG | 3   | dORF |
| 31387 | - | 4944  | ATG | 17  | dORF |
| 31407 | - | 1083  | ATC | 7   | dORF |
| 31441 | - | 7171  | AGG | 35  | dORF |
| 31466 | - | 1180  | ATT | 142 | tORF |
| 31745 | - | 13481 | ATG | 6   | dORF |
| 32280 | - | 2240  | ATG | 1   | dORF |
| 32917 | - | 1113  | AAG | 470 | tORF |
| 33845 | - | 1503  | ATG | 295 | tORF |
| 33859 | - | 6493  | ATG | 19  | dORF |
| 34088 | - | 1263  | ATT | 5   | dORF |
| 34242 | - | 6881  | ATG | 97  | tORF |
| 34880 | - | 4740  | ATT | 12  | dORF |
| 34911 | - | 3527  | ACG | 320 | tORF |
| 34937 | - | 2175  | ATT | 2   | dORF |
| 34978 | - | 2394  | ATA | 8   | dORF |
| 35056 | - | 4484  | ATG | 13  | dORF |

|       |   |       |     |     |      |
|-------|---|-------|-----|-----|------|
| 35104 | - | 4874  | ATT | 4   | dORF |
| 35129 | - | 1537  | TTG | 60  | tORF |
| 35143 | - | 7672  | ATA | 2   | dORF |
| 35162 | - | 3107  | ATA | 71  | tORF |
| 35194 | - | 4064  | ATT | 8   | dORF |
| 35220 | - | 2216  | ATA | 1   | dORF |
| 35226 | - | 3650  | AAG | 3   | dORF |
| 35374 | - | 1153  | ATA | 5   | dORF |
| 35384 | - | 1527  | AAG | 65  | tORF |
| 35417 | - | 6975  | ATG | 76  | cORF |
| 35663 | + | 1003  | ATG | 33  | nORF |
| 35752 | - | 6944  | ACG | 32  | dORF |
| 35760 | - | 17731 | ACG | 23  | dORF |
| 35783 | - | 16808 | ATC | 68  | tORF |
| 35788 | - | 24252 | ACG | 4   | nORF |
| 35822 | - | 6347  | ATT | 1   | nORF |
| 35864 | - | 11681 | ATA | 15  | dORF |
| 36441 | - | 3140  | ATA | 4   | dORF |
| 36459 | - | 2299  | AAG | 10  | dORF |
| 38811 | - | 3780  | AAG | 336 | tORF |
| 38817 | - | 3507  | ATG | 338 | tORF |
| 38835 | - | 1463  | ATT | 344 | tORF |
| 40788 | - | 2904  | AGG | 632 | tORF |
| 41815 | - | 13575 | ATA | 9   | dORF |
| 41974 | - | 2503  | ATG | 6   | nORF |
| 42113 | - | 4315  | ATG | 48  | tORF |
| 42176 | - | 11807 | TTG | 69  | tORF |
| 42177 | - | 12938 | ATT | 3   | dORF |
| 42242 | - | 1813  | ATT | 3   | nORF |
| 42315 | - | 2737  | ATG | 25  | tORF |
| 42333 | - | 4714  | TTG | 31  | tORF |
| 42387 | - | 9611  | ATG | 49  | tORF |
| 43010 | - | 3174  | ATG | 6   | dORF |
| 43049 | - | 3634  | ACG | 4   | dORF |
| 43072 | - | 2734  | ATG | 42  | tORF |
| 43085 | - | 11953 | ATC | 2   | dORF |
| 43739 | + | 2577  | ATA | 11  | dORF |
| 45585 | - | 1025  | ATA | 2   | dORF |
| 47858 | - | 10868 | ATC | 1   | dORF |
| 48073 | - | 5450  | ATG | 97  | tORF |
| 48214 | - | 1609  | CTG | 144 | tORF |
| 48235 | - | 9071  | AAG | 151 | tORF |
| 48766 | - | 1201  | ATG | 1   | dORF |
| 49329 | + | 2985  | ATG | 310 | cORF |
| 49336 | + | 3426  | ATG | 6   | dORF |
| 49398 | + | 3430  | ATG | 287 | tORF |
| 49404 | + | 1287  | AAG | 285 | tORF |
| 49511 | + | 1589  | ATT | 1   | dORF |
| 49820 | + | 2128  | ATG | 8   | dORF |
| 50307 | + | 1813  | ATG | 7   | nORF |
| 50347 | + | 1357  | ATA | 7   | nORF |
| 50350 | + | 3880  | ATT | 6   | nORF |
| 52218 | + | 6754  | ATT | 3   | dORF |
| 52222 | + | 8181  | ATG | 153 | tORF |
| 52243 | + | 3244  | ATG | 146 | tORF |
| 52276 | + | 8194  | ATG | 135 | tORF |

|       |   |       |     |     |      |
|-------|---|-------|-----|-----|------|
| 52838 | + | 6911  | GTG | 263 | tORF |
| 52848 | + | 2220  | ATG | 6   | dORF |
| 56411 | - | 1236  | ATG | 23  | dORF |
| 56588 | - | 1558  | ATG | 4   | dORF |
| 56622 | - | 1826  | ACG | 8   | dORF |
| 56631 | - | 6697  | TTG | 11  | dORF |
| 57314 | - | 13024 | AAG | 114 | tORF |
| 57321 | - | 3673  | AAG | 19  | dORF |
| 57328 | - | 2340  | ATG | 4   | dORF |
| 57346 | - | 3406  | ATA | 3   | dORF |
| 59240 | - | 2578  | ATG | 29  | dORF |
| 59290 | - | 1079  | ATT | 3   | dORF |
| 59318 | - | 1257  | AGG | 10  | dORF |
| 59322 | - | 1790  | AGG | 658 | tORF |
| 59336 | - | 1266  | ATC | 16  | dORF |
| 59340 | - | 1380  | ATG | 664 | tORF |
| 59601 | - | 12474 | AGG | 3   | dORF |
| 59604 | - | 7138  | AAG | 4   | dORF |
| 59680 | - | 8601  | AAG | 1   | dORF |
| 59780 | - | 3064  | ATA | 4   | dORF |
| 59820 | - | 4020  | TTG | 20  | dORF |
| 60694 | - | 3975  | ATG | 9   | dORF |
| 60725 | - | 5097  | ATG | 3   | dORF |
| 60887 | - | 3195  | ATT | 2   | dORF |
| 61827 | - | 12151 | AAG | 264 | tORF |
| 61902 | - | 1057  | ATG | 2   | nORF |
| 64217 | - | 1180  | ATA | 7   | dORF |
| 64236 | - | 1193  | TTG | 27  | dORF |
| 64328 | - | 1080  | ATA | 16  | dORF |
| 64370 | - | 1813  | ATC | 3   | dORF |
| 64381 | - | 1529  | ATT | 3   | dORF |
| 64418 | - | 1243  | AGG | 2   | dORF |
| 64443 | - | 1117  | ATT | 58  | tORF |
| 64458 | - | 1503  | ATG | 63  | tORF |
| 64476 | - | 4417  | ATA | 69  | tORF |
| 65654 | - | 1247  | AAG | 1   | dORF |
| 65663 | - | 1667  | TTG | 4   | dORF |
| 66864 | - | 5364  | ATT | 2   | dORF |
| 67636 | - | 1127  | AAG | 3   | dORF |
| 67771 | - | 1547  | ATA | 16  | dORF |
| 68996 | - | 1142  | ATG | 8   | nORF |
| 70500 | + | 1645  | ATG | 2   | uORF |
| 70535 | + | 1400  | ATG | 8   | uORF |
| 70725 | - | 6274  | ATT | 582 | tORF |
| 71480 | - | 1256  | ATG | 9   | nORF |
| 71496 | - | 1980  | ACG | 7   | nORF |
| 71996 | - | 7414  | ATG | 12  | dORF |
| 72050 | - | 3047  | ATT | 11  | dORF |
| 72066 | - | 7261  | ATT | 118 | tORF |
| 72108 | - | 1043  | ATT | 4   | nORF |
| 72129 | - | 1097  | ATT | 11  | nORF |
| 72177 | - | 1557  | ATA | 27  | nORF |
| 72253 | - | 3870  | ATG | 18  | nORF |
| 72304 | - | 1513  | ATA | 35  | nORF |
| 72373 | - | 1640  | TTG | 58  | nORF |
| 72408 | - | 1313  | ATG | 15  | nORF |



|       |   |       |     |     |      |
|-------|---|-------|-----|-----|------|
| 72432 | - | 1323  | ATC | 2   | nORF |
| 72748 | + | 1056  | ATG | 9   | dORF |
| 73205 | + | 4427  | ATC | 16  | dORF |
| 73248 | - | 1057  | ATC | 6   | nORF |
| 73290 | + | 1237  | AAG | 33  | tORF |
| 73433 | + | 4107  | AAG | 9   | dORF |
| 73452 | + | 1957  | ATA | 1   | dORF |
| 73476 | + | 2536  | ATC | 14  | dORF |
| 73540 | + | 2514  | ATA | 16  | tORF |
| 73689 | - | 1297  | ATC | 5   | nORF |
| 75077 | - | 1244  | ATA | 6   | dORF |
| 75096 | - | 1120  | ATA | 8   | dORF |
| 75447 | + | 1283  | ATG | 4   | dORF |
| 76126 | + | 1706  | ATG | 3   | dORF |
| 77055 | + | 4464  | GTG | 240 | tORF |
| 77072 | + | 9794  | ACG | 4   | dORF |
| 77813 | + | 4457  | AAG | 6   | dORF |
| 77825 | + | 8117  | ATC | 2   | dORF |
| 77842 | + | 4254  | GTG | 76  | tORF |
| 77852 | + | 1122  | ATA | 1   | dORF |
| 77870 | + | 2667  | TTG | 1   | dORF |
| 77904 | + | 4425  | ATG | 9   | dORF |
| 77972 | + | 1410  | ATA | 6   | dORF |
| 78010 | + | 5494  | ATG | 20  | dORF |
| 78713 | + | 1290  | ATA | 1   | nORF |
| 78777 | + | 1173  | CTG | 23  | nORF |
| 79071 | - | 1368  | ATC | 77  | dORF |
| 79173 | + | 13293 | ATA | 35  | dORF |
| 79185 | + | 6211  | TTG | 31  | dORF |
| 79196 | + | 8061  | ATA | 232 | tORF |
| 79206 | + | 27906 | ATG | 24  | dORF |
| 79240 | + | 4150  | ATC | 11  | dORF |
| 79302 | + | 5237  | ATG | 4   | dORF |
| 79355 | + | 1070  | ATG | 179 | tORF |
| 79937 | + | 1080  | GTG | 117 | tORF |
| 80196 | + | 2334  | ATA | 4   | dORF |
| 80207 | + | 1083  | ATA | 27  | tORF |
| 80263 | + | 9017  | ATC | 2   | dORF |
| 80297 | + | 3007  | ATT | 2   | dORF |
| 80431 | + | 1967  | ATG | 10  | dORF |
| 80737 | + | 1593  | ATA | 3   | dORF |
| 80825 | + | 1353  | ATG | 7   | dORF |
| 81342 | + | 4720  | ATA | 13  | dORF |
| 81353 | + | 2204  | ATG | 323 | tORF |
| 81387 | + | 6331  | ACG | 18  | dORF |
| 82095 | + | 6183  | ATG | 9   | nORF |
| 82095 | + | 1320  | ATG | 9   | uORF |
| 83239 | - | 1687  | ATG | 21  | dORF |
| 83310 | + | 1290  | AAG | 14  | uORF |
| 83351 | + | 1456  | CTG | 2   | uORF |
| 83390 | + | 17095 | ATA | 32  | dORF |
| 83399 | + | 2686  | ATG | 29  | dORF |
| 87714 | - | 5630  | ATA | 24  | dORF |
| 87726 | - | 7667  | AAG | 3   | dORF |
| 87794 | + | 1230  | ACG | 6   | dORF |
| 87805 | + | 1960  | AAG | 171 | tORF |

|        |   |       |     |     |      |
|--------|---|-------|-----|-----|------|
| 88545  | - | 3524  | ATG | 73  | tORF |
| 88603  | - | 5459  | ATG | 5   | dORF |
| 89125  | - | 10225 | ATT | 44  | dORF |
| 89160  | - | 9114  | AAG | 8   | dORF |
| 89213  | - | 10314 | ATT | 296 | tORF |
| 91821  | + | 28838 | ATA | 16  | uORF |
| 91831  | + | 6266  | ATT | 20  | uORF |
| 91865  | + | 29076 | ATC | 205 | tORF |
| 91893  | + | 23642 | AAG | 16  | dORF |
| 91919  | + | 23869 | ATG | 187 | tORF |
| 91962  | + | 6356  | AAG | 11  | dORF |
| 93510  | + | 1539  | TTG | 3   | dORF |
| 93988  | + | 8131  | ATA | 1   | dORF |
| 96491  | + | 1783  | ATG | 9   | nORF |
| 96736  | - | 1849  | ATA | 20  | dORF |
| 96739  | + | 1093  | ATG | 1   | nORF |
| 96789  | - | 1487  | ATA | 18  | dORF |
| 96937  | - | 1277  | ATA | 15  | nORF |
| 97616  | + | 1203  | ATA | 7   | dORF |
| 97636  | + | 3903  | ATG | 5   | dORF |
| 98071  | + | 1480  | ATT | 8   | dORF |
| 98292  | + | 2647  | AGG | 1   | dORF |
| 98297  | + | 1285  | ATG | 9   | dORF |
| 98309  | + | 2374  | TTG | 5   | dORF |
| 98351  | + | 3320  | ATG | 6   | dORF |
| 98400  | + | 1383  | ATA | 2   | dORF |
| 100698 | + | 2937  | TTG | 15  | dORF |
| 102420 | + | 1347  | ATG | 3   | dORF |
| 102592 | + | 1290  | ATG | 6   | nORF |
| 102632 | + | 2366  | ATG | 12  | dORF |
| 102636 | + | 3034  | ATA | 17  | dORF |
| 102705 | + | 2807  | ATA | 1   | dORF |
| 103338 | - | 1750  | ATT | 2   | dORF |
| 103593 | - | 1135  | ATG | 6   | dORF |
| 103674 | - | 1650  | ATA | 33  | dORF |
| 103772 | - | 1387  | ATA | 23  | dORF |
| 103826 | - | 2690  | ATA | 9   | dORF |
| 103847 | - | 1437  | AAG | 2   | dORF |
| 103896 | - | 2547  | ATT | 15  | dORF |
| 103935 | - | 1543  | AAG | 7   | dORF |
| 103950 | - | 1153  | ATA | 1   | dORF |
| 103961 | - | 1213  | ATC | 3   | dORF |
| 104005 | + | 1327  | ATA | 6   | nORF |
| 104013 | - | 1333  | AAG | 4   | nORF |
| 104029 | + | 2614  | ATG | 209 | tORF |
| 104176 | - | 11379 | ATG | 4   | nORF |
| 104222 | - | 2140  | AAG | 7   | nORF |
| 104234 | - | 1327  | GTG | 11  | nORF |
| 104261 | + | 1112  | ATG | 2   | dORF |
| 104324 | - | 9754  | AAG | 1   | nORF |
| 104504 | - | 23992 | ATG | 2   | nORF |
| 104544 | - | 54778 | ATG | 2   | nORF |
| 105489 | - | 2280  | ATA | 5   | dORF |
| 105499 | - | 2187  | ATG | 6   | dORF |
| 107289 | - | 8794  | ATC | 14  | dORF |
| 107960 | - | 2127  | ATG | 3   | dORF |

|        |   |       |     |     |      |
|--------|---|-------|-----|-----|------|
| 108082 | - | 3087  | ATA | 3   | dORF |
| 108140 | - | 3004  | ATG | 10  | dORF |
| 108174 | - | 2307  | ATC | 280 | tORF |
| 108176 | - | 1635  | ATA | 22  | dORF |
| 109777 | - | 20498 | ATA | 19  | dORF |
| 109800 | - | 11754 | ATT | 524 | tORF |
| 109836 | - | 23902 | ATT | 536 | tORF |
| 109857 | - | 15168 | TTG | 543 | tORF |
| 109866 | - | 26472 | ATT | 546 | tORF |
| 109920 | - | 3790  | ACG | 11  | nORF |
| 109951 | - | 4997  | AAG | 6   | dORF |
| 109978 | - | 3647  | ACG | 15  | dORF |
| 110257 | - | 2827  | ATT | 14  | dORF |
| 110300 | - | 10574 | AAG | 131 | tORF |
| 110311 | - | 2634  | AAG | 32  | dORF |
| 110436 | - | 1778  | ATG | 7   | dORF |
| 110994 | - | 4437  | ATG | 31  | dORF |
| 111029 | - | 2417  | TTG | 1   | dORF |
| 111044 | - | 12384 | ACG | 3   | dORF |
| 111084 | - | 8071  | ATA | 11  | tORF |
| 113112 | - | 10274 | ATC | 4   | dORF |
| 113175 | - | 19032 | ATC | 1   | dORF |
| 113219 | - | 38153 | GTG | 641 | tORF |
| 114047 | - | 6915  | AGG | 12  | dORF |
| 114066 | - | 17230 | ATC | 261 | tORF |
| 114075 | - | 14201 | AAG | 264 | tORF |
| 114101 | - | 12808 | AGG | 30  | dORF |
| 114180 | + | 1080  | ATA | 25  | dORF |
| 114192 | + | 2247  | ATG | 21  | dORF |
| 114222 | + | 1253  | ATG | 11  | dORF |
| 114358 | - | 2312  | ATG | 18  | uORF |
| 115676 | - | 3546  | ATT | 3   | dORF |
| 115727 | - | 11461 | AAG | 20  | dORF |
| 115828 | - | 1137  | ATC | 8   | dORF |
| 115895 | - | 1043  | ATG | 32  | tORF |
| 115901 | - | 1127  | ACG | 34  | tORF |
| 115936 | - | 1203  | ACG | 14  | dORF |
| 117574 | - | 2267  | ATG | 30  | dORF |
| 117848 | + | 1470  | ATG | 2   | nORF |
| 118002 | + | 1481  | ATC | 7   | dORF |
| 118061 | + | 1894  | ATG | 262 | tORF |
| 118114 | - | 1323  | ATG | 3   | nORF |
| 119052 | - | 1356  | ACG | 10  | dORF |
| 119150 | - | 2060  | ATA | 102 | tORF |
| 121679 | + | 2274  | ATG | 3   | nORF |
| 121792 | - | 88374 | ATT | 4   | dORF |
| 121816 | - | 20335 | TTG | 3   | dORF |
| 121881 | + | 2320  | ATA | 5   | dORF |
| 121893 | + | 1083  | ATT | 1   | dORF |
| 121894 | - | 1947  | ATC | 17  | nORF |
| 121923 | + | 1203  | ATC | 8   | dORF |
| 122107 | - | 1868  | TTG | 9   | nORF |
| 122366 | - | 1060  | TTG | 2   | nORF |
| 122448 | - | 1449  | ATA | 32  | nORF |
| 122703 | - | 1052  | ATC | 48  | nORF |
| 123379 | - | 53141 | ATT | 1   | dORF |

|        |   |       |     |      |      |
|--------|---|-------|-----|------|------|
| 123568 | - | 6787  | ATG | 49   | tORF |
| 123575 | - | 21805 | ATA | 4    | dORF |
| 123921 | - | 19832 | ATT | 60   | tORF |
| 123983 | - | 45924 | ATT | 5    | dORF |
| 124436 | - | 1514  | ATT | 85   | tORF |
| 124439 | - | 1367  | ATA | 86   | tORF |
| 125933 | + | 1681  | ATG | 2    | uORF |
| 126061 | - | 11638 | ATG | 3    | dORF |
| 126133 | - | 22689 | ATA | 19   | dORF |
| 126183 | - | 53588 | AAG | 6    | dORF |
| 126224 | + | 5584  | ATG | 488  | tORF |
| 127764 | - | 11810 | ATC | 5    | dORF |
| 127787 | - | 4086  | AAG | 38   | tORF |
| 127862 | - | 14125 | AAG | 63   | tORF |
| 127877 | - | 25602 | ATG | 68   | tORF |
| 128178 | - | 1160  | ACG | 20   | dORF |
| 129522 | + | 1334  | AAG | 6    | dORF |
| 130080 | + | 3897  | ATA | 372  | tORF |
| 131140 | + | 1470  | ATA | 2    | dORF |
| 131219 | + | 5414  | ATG | 1156 | cORF |
| 131238 | + | 1609  | ATA | 35   | dORF |
| 131876 | - | 1293  | ATG | 29   | nORF |
| 137695 | - | 2130  | ATG | 47   | dORF |
| 138290 | - | 8844  | ATT | 683  | tORF |
| 138332 | - | 9415  | TTG | 697  | tORF |
| 138373 | - | 16365 | AAG | 6    | dORF |
| 138383 | - | 16355 | AAG | 714  | tORF |
| 139883 | - | 2384  | ATC | 4    | dORF |
| 139908 | - | 2175  | ATG | 10   | dORF |
| 139943 | - | 1233  | ATG | 11   | dORF |
| 140292 | - | 11424 | ATT | 7    | dORF |
| 140762 | - | 1443  | ATT | 138  | tORF |
| 141495 | + | 1163  | ATG | 17   | nORF |
| 141644 | + | 1557  | ATG | 1    | nORF |
| 141645 | - | 2480  | ATT | 6    | dORF |
| 141753 | - | 2717  | AAG | 28   | tORF |
| 141799 | + | 2165  | ATG | 4    | nORF |
| 141813 | + | 5087  | ATG | 1    | nORF |
| 141814 | - | 2630  | ATT | 5    | dORF |
| 141833 | - | 2016  | ATG | 17   | dORF |
| 141857 | - | 2557  | ATT | 25   | dORF |
| 141861 | - | 4394  | ATA | 64   | tORF |
| 141868 | + | 1567  | ATG | 1    | nORF |
| 141946 | + | 1423  | ATG | 2    | nORF |
| 142015 | - | 9774  | CTG | 12   | dORF |
| 142029 | - | 6514  | ACG | 42   | dORF |
| 142069 | + | 1970  | ATT | 121  | tORF |
| 142101 | + | 2037  | ATC | 3    | dORF |
| 142138 | + | 1430  | AAG | 98   | tORF |
| 142279 | + | 1115  | ATG | 51   | tORF |
| 142342 | + | 1184  | TTG | 30   | tORF |
| 142427 | + | 1179  | ATG | 15   | nORF |
| 143112 | + | 3467  | ATA | 11   | nORF |
| 143135 | + | 2140  | ATC | 7    | nORF |
| 143152 | + | 2504  | ATT | 30   | nORF |
| 143165 | - | 1120  | ATG | 254  | tORF |

|        |   |       |     |     |      |
|--------|---|-------|-----|-----|------|
| 143175 | + | 1230  | ATT | 3   | nORF |
| 143208 | + | 1000  | ATT | 8   | nORF |
| 143235 | + | 1420  | ATT | 11  | nORF |
| 143259 | + | 41610 | ATG | 3   | nORF |
| 143294 | + | 5229  | AAG | 39  | uORF |
| 143347 | + | 2769  | ACG | 26  | dORF |
| 143367 | + | 3270  | GTG | 173 | tORF |
| 143397 | + | 8107  | ATT | 163 | tORF |
| 143948 | + | 25455 | AAG | 156 | tORF |
| 144066 | - | 1250  | ATC | 14  | nORF |
| 144475 | + | 2620  | TTG | 8   | dORF |
| 144504 | + | 1117  | ATA | 162 | tORF |
| 144520 | + | 1639  | ATG | 11  | dORF |
| 144560 | + | 1771  | ATA | 4   | dORF |
| 145038 | + | 3004  | ACG | 228 | tORF |
| 145117 | + | 2230  | ATA | 20  | dORF |
| 145432 | + | 1035  | ATC | 12  | dORF |
| 146657 | + | 1143  | ATA | 66  | tORF |
| 146739 | + | 1030  | CTG | 19  | dORF |
| 147698 | - | 2207  | ATA | 11  | nORF |
| 147704 | + | 1833  | ATG | 257 | cORF |
| 147718 | + | 3180  | ATT | 7   | dORF |
| 147735 | + | 2087  | TTG | 15  | dORF |
| 147751 | + | 1994  | ATG | 2   | dORF |
| 147762 | + | 1800  | TTG | 6   | dORF |
| 147767 | + | 1070  | ACG | 236 | tORF |
| 147779 | + | 1367  | ATA | 232 | tORF |
| 147825 | + | 1197  | ATG | 11  | dORF |
| 147923 | + | 1443  | AAG | 184 | tORF |
| 148419 | + | 1607  | ATA | 22  | nORF |
| 148422 | + | 813   | ATG | 21  | dORF |
| 148975 | + | 2381  | ATG | 19  | dORF |
| 149063 | + | 3927  | ACG | 114 | tORF |
| 149088 | + | 1440  | AAG | 7   | dORF |
| 149618 | + | 1405  | ATA | 2   | nORF |
| 149986 | - | 1540  | ATG | 9   | dORF |
| 150336 | + | 10228 | ATG | 2   | dORF |
| 150383 | + | 1067  | ATG | 13  | dORF |
| 150398 | + | 18628 | ATT | 8   | dORF |
| 150451 | + | 4104  | AAG | 92  | tORF |
| 151371 | + | 2340  | ATG | 74  | tORF |
| 151422 | + | 1083  | ATA | 57  | tORF |
| 151622 | + | 2787  | ATA | 10  | nORF |
| 151649 | + | 2967  | GTG | 1   | nORF |
| 151689 | + | 1030  | ATA | 19  | nORF |
| 151742 | + | 24329 | ACG | 6   | nORF |
| 151842 | + | 1387  | ATG | 3   | nORF |
| 152687 | - | 1427  | ATA | 1   | dORF |
| 152723 | - | 1780  | ACG | 9   | dORF |
| 152810 | + | 2884  | ATC | 115 | tORF |
| 152815 | + | 3726  | AGG | 5   | dORF |
| 153154 | + | 6867  | TTG | 10  | dORF |
| 153187 | + | 1010  | ATG | 2   | dORF |
| 153221 | + | 1452  | ATT | 4   | dORF |
| 153268 | + | 1057  | TTG | 5   | dORF |
| 153316 | + | 3605  | ATG | 3   | dORF |

|        |   |       |     |     |      |
|--------|---|-------|-----|-----|------|
| 153454 | + | 6104  | ATA | 10  | dORF |
| 153749 | + | 4682  | ATA | 4   | dORF |
| 154612 | - | 1368  | ATG | 231 | tORF |
| 154775 | + | 1124  | ATG | 204 | cORF |
| 154800 | + | 1472  | TTG | 13  | dORF |
| 155433 | + | 2570  | ATA | 3   | uORF |
| 155822 | + | 1087  | ATG | 8   | dORF |
| 155900 | + | 1373  | ATG | 11  | uORF |
| 157686 | + | 1410  | ATA | 18  | dORF |
| 158752 | + | 1950  | AAG | 187 | tORF |
| 158797 | + | 1063  | AGG | 172 | tORF |
| 158807 | + | 1410  | ATG | 29  | dORF |
| 159273 | + | 1511  | ATC | 5   | dORF |
| 159516 | + | 2757  | ATA | 4   | nORF |
| 161748 | - | 2180  | ATC | 12  | nORF |
| 162043 | + | 2484  | ATG | 4   | dORF |
| 162188 | + | 4560  | ACG | 21  | dORF |
| 162258 | + | 1373  | ATA | 289 | tORF |
| 162265 | + | 1874  | ATG | 17  | dORF |
| 162286 | + | 1681  | ATC | 10  | dORF |
| 162330 | + | 1950  | AAG | 265 | tORF |
| 162896 | + | 2017  | ATC | 4   | dORF |
| 162927 | + | 1387  | ACG | 66  | tORF |
| 163162 | + | 22912 | ATC | 56  | dORF |
| 163219 | + | 8677  | ATG | 37  | dORF |
| 163846 | + | 1393  | ATG | 4   | nORF |
| 163903 | + | 1139  | CTG | 12  | dORF |
| 163922 | + | 1510  | ATG | 13  | dORF |
| 163930 | + | 1427  | TTG | 3   | dORF |
| 164001 | + | 1013  | ATA | 259 | tORF |
| 164107 | + | 1320  | ACG | 1   | dORF |
| 164323 | + | 1479  | AAG | 4   | dORF |
| 164883 | + | 3914  | ACG | 41  | dORF |
| 164965 | + | 1058  | ATA | 7   | dORF |
| 167189 | + | 1443  | ATG | 4   | dORF |
| 168319 | + | 1247  | TTG | 45  | uORF |
| 168380 | + | 7344  | ACG | 315 | tORF |
| 168426 | + | 6341  | ATT | 8   | dORF |
| 168501 | + | 5190  | AAG | 50  | dORF |
| 168526 | + | 9235  | ATA | 13  | dORF |
| 169334 | + | 1253  | ATC | 2   | nORF |
| 169379 | + | 1208  | ATT | 4   | uORF |
| 170020 | + | 2327  | ATT | 11  | dORF |
| 170576 | + | 3943  | ATA | 10  | dORF |
| 172541 | + | 1482  | AAG | 279 | tORF |
| 172570 | + | 2456  | ATG | 10  | dORF |
| 173417 | + | 1737  | ACG | 3   | uORF |
| 173702 | + | 1356  | AAG | 4   | dORF |
| 174658 | + | 1849  | ACG | 5   | dORF |
| 174680 | + | 4694  | ATA | 25  | dORF |
| 175124 | + | 3158  | ATA | 324 | tORF |
| 175158 | + | 4917  | ATT | 25  | dORF |
| 175192 | + | 1723  | ATG | 33  | dORF |
| 175203 | + | 1427  | AAG | 10  | dORF |
| 175204 | + | 1275  | AGG | 29  | dORF |
| 175288 | + | 1247  | ATA | 1   | dORF |

|        |   |       |     |     |      |
|--------|---|-------|-----|-----|------|
| 176259 | - | 1021  | ATG | 3   | dORF |
| 176836 | + | 1013  | ATA | 1   | nORF |
| 177293 | + | 1172  | AAG | 21  | nORF |
| 178666 | + | 1733  | ATG | 2   | dORF |
| 178751 | + | 1280  | ATG | 2   | dORF |
| 178959 | + | 1093  | ATA | 23  | tORF |
| 179114 | + | 4622  | ATG | 347 | tORF |
| 179184 | + | 6752  | ATG | 9   | dORF |
| 179232 | + | 1086  | AAG | 5   | dORF |
| 179394 | + | 8489  | ATA | 17  | dORF |
| 180302 | + | 1085  | ATA | 113 | tORF |
| 182263 | + | 1620  | ATG | 9   | nORF |
| 182363 | - | 1327  | ATC | 6   | nORF |
| 182410 | + | 1100  | ACG | 14  | nORF |
| 182636 | + | 11288 | ATC | 8   | dORF |
| 183606 | + | 1143  | ATG | 6   | nORF |
| 183614 | + | 1203  | ATA | 7   | nORF |
| 185412 | + | 1347  | ATG | 16  | nORF |
| 185436 | + | 2013  | ATT | 8   | nORF |
| 186236 | + | 1010  | GTG | 188 | tORF |
| 186283 | + | 1013  | ATA | 1   | dORF |
| 187337 | - | 1283  | ATC | 126 | tORF |
| 187390 | - | 27484 | ATC | 6   | nORF |
| 187413 | - | 7787  | CTG | 31  | nORF |
| 187539 | + | 7210  | ATG | 16  | nORF |
| 187560 | + | 1370  | ATT | 9   | nORF |
| 189266 | + | 1067  | ATA | 27  | dORF |
| 190222 | + | 3024  | ATT | 4   | nORF |
| 190237 | + | 3530  | AAG | 1   | nORF |
| 190261 | + | 5594  | TTG | 8   | nORF |
| 190270 | + | 6807  | AAG | 5   | nORF |
| 190287 | + | 6564  | AAG | 66  | nORF |
| 190314 | + | 12001 | ATG | 57  | cORF |
| 190322 | + | 28531 | ATA | 249 | tORF |
| 190384 | + | 5240  | GTG | 27  | dORF |
| 190392 | + | 4634  | AAG | 31  | dORF |
| 190434 | + | 1095  | AAG | 17  | dORF |
| 194583 | - | 8024  | ATG | 4   | nORF |
| 194638 | - | 1080  | ATA | 1   | nORF |
| 194667 | + | 2297  | ATT | 4   | nORF |
| 194704 | - | 4664  | ATA | 1   | nORF |

\*Position of start codon

\*\*cORF, correction of annotated ORF; dORF: downstream frameshifting ORF; nORF, previous unannotated non-coding region ORF; tORF: downstream truncated ORF or upstream non-frame shifting ORF; uORF, upstream ORF.

## References

1. **Yang Z, Bruno DP, Martens CA, Porcella SF, Moss B.** 2010. Simultaneous high-resolution analysis of vaccinia virus and host cell transcriptomes by deep RNA sequencing. *Proc. Natl. Acad. Sci. USA* **107**:11513-11518.
2. **Yang Z, Reynolds SE, Martens CA, Bruno DP, Porcella SF, Moss B.** 2011. Expression profiling of the intermediate and late stages of poxvirus replication. *J. Virol.* **85**:9899-9908.
